# Supplementary material for: Msn2/4 transcription factors positively regulate expression of Atg39 ER-phagy receptor
Source: PubMed Central journal article supplement (PMC8184937; doi:10.1038/s41598-021-91480-0), 2021-06-07
Supplement: 41598_2021_91480_MOESM1_ESM.pdf [file 41598_2021_91480_MOESM1_ESM.pdf]

Title:

Msn2/4 transcription factors positively regulate expression of Atg39 ER-phagy receptor

Authors:

Tomoaki Mizuno\* and Kenji Irie

Affiliation:

Department of Molecular Cell Biology, Faculty of Medicine, University of Tsukuba, Tsukuba, Japan.

\*Correspondence and requests for materials should be addressed to T. M. (mizuno@md.tsukuba.ac.jp)

## Supplementary Figure 1.

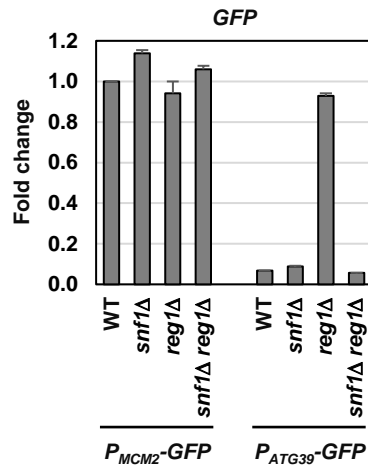

### Supplementary Figure 1. The $P_{ATG39}$ -GFP reporter activity is upregulated by Snf1 activation.

Wild-type (WT) and indicated mutant strains harboring the  $P_{ATG39}$ -GFP reporter were grown at 25 °C until exponential phase and then harvested. The GFP mRNA levels were quantified by qRT-PCR analysis, and relative mRNA levels were calculated using *ACT1* mRNA. The values are plotted as the fold change from wild-type cells. The data show mean  $\pm$  SEM (n = 3).

## Supplementary Figure 2.

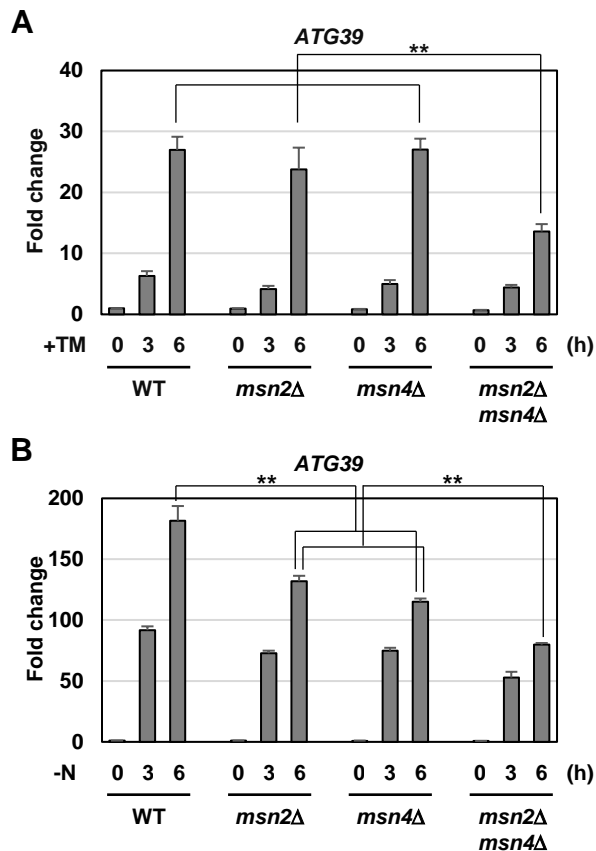

### Supplementary Figure 2. Msn2 and Msn4 redundantly regulate *ATG39* expression.

(A, B) Wild-type (WT) and indicated mutant strains were grown at 25 °C until exponential phase and treated with 3 μg/ml tunicamycin (TM) (A) or incubated under nitrogen-starved conditions (B) for the indicated time. The *ATG39* mRNA levels were quantified by qRT-PCR analysis, and relative mRNA levels were calculated using *ACT1* mRNA. The values are plotted as the fold change from wild-type cells at the time of TM addition or nitrogen removal. The data show mean ± SEM (n = 3). NS, not statistically significant ( $P > 0.05$ ), as determined by Student's *t*-test.

### Supplementary Figure 3.

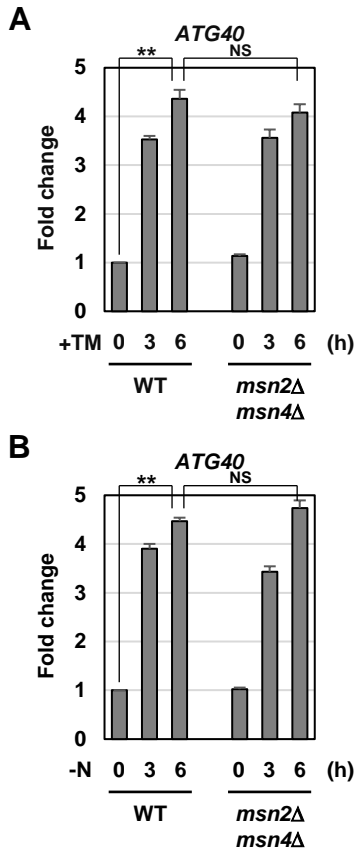

**Supplementary Figure 3. The *ATG40* mRNA levels were unchanged in *msn2 msn4* mutants.**

(A, B) Wild-type (WT) and *msn2 msn4* mutant strains were grown at 25 °C until exponential phase and treated with 3 µg/ml tunicamycin (TM) (A) or incubated under nitrogen-starved conditions (B) for the indicated time. The *ATG40* mRNA levels were quantified by qRT-PCR analysis, and relative mRNA levels were calculated using *ACT1* mRNA. The values are plotted as the fold change from wild-type cells at the time of TM addition or nitrogen removal. The data show mean  $\pm$  SEM (n = 3). NS, not statistically significant ( $P > 0.05$ ), as determined by Student's *t*-test.

## Supplementary Figure 4.

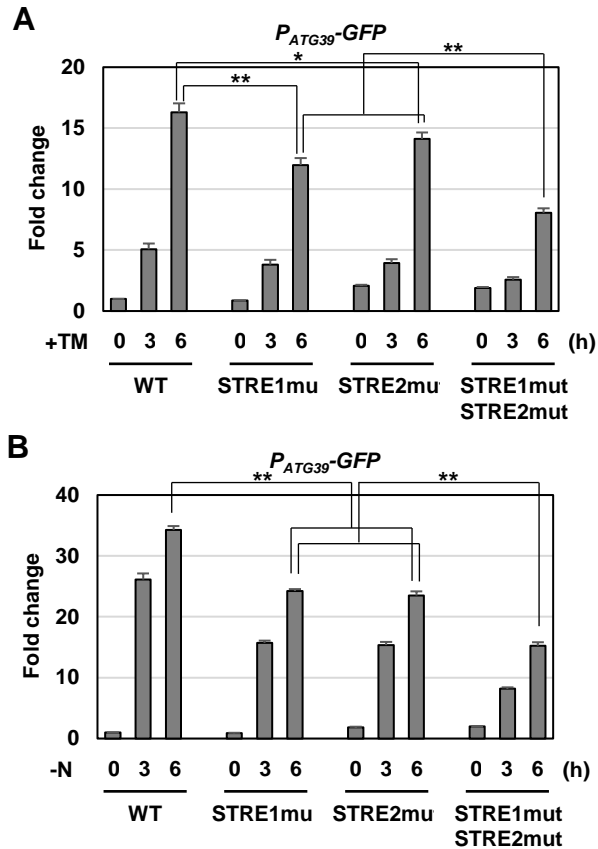

### Supplementary Figure 4. The STRE elements redundantly regulate *ATG39* expression.

(A, B) Wild-type (WT) cells harboring wild-type or mutated  $P_{ATG39}\text{-GFP}$  reporters were grown at 25 °C until exponential phase and treated with 3  $\mu\text{g/ml}$  tunicamycin (TM) (A) or incubated under nitrogen-starved conditions (B) for the indicated time. The *GFP* mRNA levels were quantified by qRT-PCR analysis, and relative mRNA levels were calculated using *ACT1* mRNA. The values are plotted as the fold change from wild-type cells at the time of TM addition or nitrogen removal. The data show mean  $\pm$  SEM ( $n > 3$ ). \* $P < 0.05$  and \*\* $P < 0.01$  as determined by Student's *t*-test. NS, not statistically significant ( $P > 0.05$ ).

## Supplementary Figure 5.

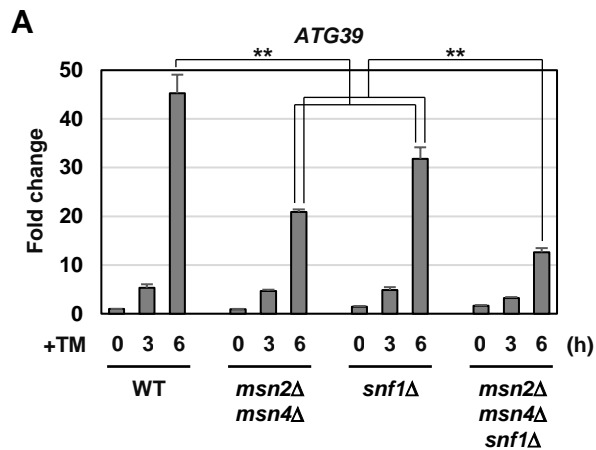

### Supplementary Figure 5. Msn2/4 and Snf1 independently regulate *ATG39* expression.

The *ATG39* mRNA levels in *msn2 msn4 snf1* mutant. Wild-type (WT) and indicated mutant strains were grown at 25 °C until exponential phase and treated with 3 µg/ml tunicamycin (TM) for the indicated time. The *ATG39* mRNA levels were quantified by qRT-PCR analysis, and relative mRNA levels were calculated using *ACT1* mRNA. The values are plotted as the fold change from wild-type cells at the time of TM addition. The data show mean  $\pm$  SEM (n = 4). \*\* $P < 0.01$  as determined by Student's *t*-test.

## Supplementary Figure 6.

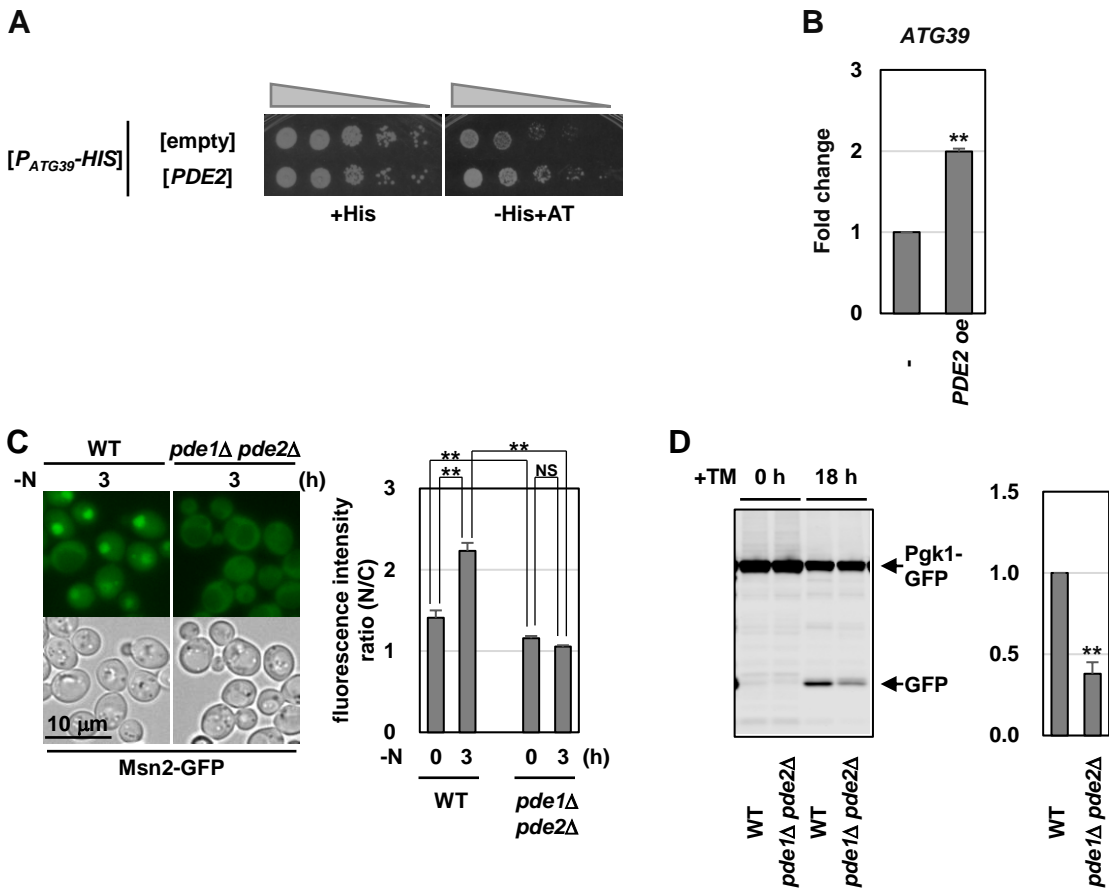

**Supplementary Figure 6. The cAMP phosphodiesterases regulate *ATG39* expression and the activity of non-selective autophagy.**

(A) Effects of *PDE2* overexpression on growth of cells harboring  $P_{ATG39}$ -*HIS3* reporter. Wild-type (WT) cells harboring the  $P_{ATG39}$ -*HIS3* reporter and the plasmids with or without the *PDE2* gene were spotted onto synthetic defined media lacking or containing histidine (His) and 3-amino-1H-1,2,4-triazole (AT), and incubated at 25 °C.

(B) Effects of *PDE2* overexpression on *ATG39* expression. Wild-type strains harboring the plasmids with or without the *PDE2* genes were grown at 25 °C until exponential phase and then harvested. The *ATG39* mRNA levels were quantified by qRT-PCR analysis, and relative mRNA levels were calculated using *ACT1* mRNA. The values are plotted as the fold change from wild-type cells harboring the empty plasmids. The data show mean  $\pm$  SEM ( $n = 4$ ).  $**P < 0.01$  as determined by Student's *t*-test.

(C) Cellular localization of Msn2. Wild-type (WT) and *pde1 pde2* mutant strains harboring GFP-tagged *MSN2* were grown at 25 °C until exponential phase, incubated under nitrogen-starved conditions for 3 hr, and subjected to microscopy. The fluorescence intensities were measured, and then the ratios (N/C) of the fluorescence intensity per unit area in the nucleus/that in the cytoplasm were calculated. The graphs show mean  $\pm$  SEM ( $n = 30$ ).  $**P < 0.01$  as determined by Student's *t*-test. NS, not statistically significant ( $P > 0.05$ ). Scale bar, 10  $\mu$ m.

(D) Pgk1-GFP degradation in ER-stressed *pde1 pde2* mutant. Wild-type (WT) and *pde1 pde2* mutant strains harboring GFP-tagged *PGK1* were grown at 25 °C until exponential phase and treated with 3  $\mu$ g/ml tunicamycin (TM) for 18 hr. Extracts prepared from each cell were immunoblotted with anti-GFP antibodies. The intensities of free GFP were measured and normalized to the Pgk1-GFP level. The values are plotted as the fold change from wild-type cells. The data show mean  $\pm$  SEM ( $n = 3$ ). NS, not statistically significant ( $P > 0.05$ ), as determined by Student's *t*-test.



**Supplementary Figure 7**  
(Original data for Fig. 4A)

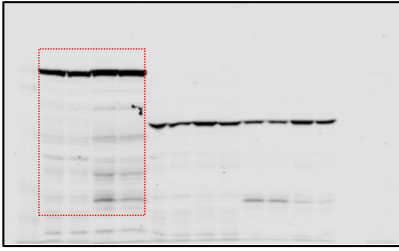

**Supplementary Figure 8**  
(Original data for Fig. 4B)

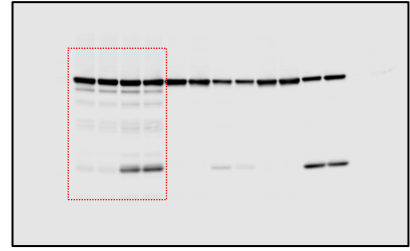

**Supplementary Figure 9**  
(Original data for Fig. 4C)

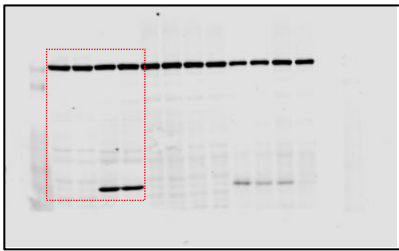

**Supplementary Figure 10**  
(Original data for Fig. 4D)

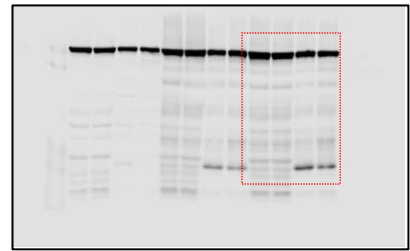

**Supplementary Figure 11**  
(Original data for Fig. 4E)

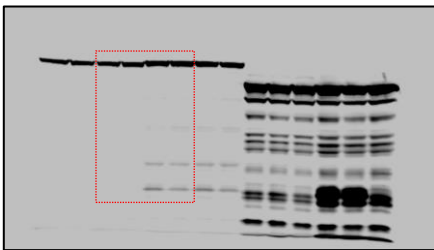

**Supplementary Figure 12**  
(Original data for Fig. 5F)

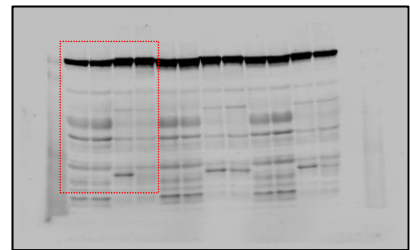

**Supplementary Figure 13**  
(Original data for  
Supplementary Figure 6D)

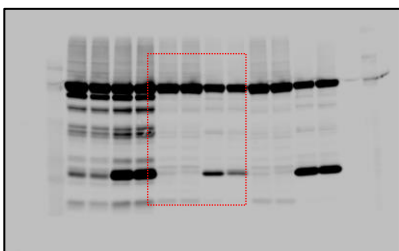

**Supplementary Table 1**

| Group | Plasmid | Included genes                                          |
|-------|---------|---------------------------------------------------------|
| I     | 1       | <i>NAB6, YML116W-A, ATR1, VAN1, TAF8</i>                |
| I     | 2       | <i>NAB6, YML116W-A, ATR1, VAN1, TAF8</i>                |
| I     | 3       | <i>NAB6, YML116W-A, ATR1, VAN1, TAF8</i>                |
| I     | 4       | <i>ATR1, VAN1</i>                                       |
| I     | 5       | <i>ATR1, VAN1</i>                                       |
| I     | 6       | <i>ATR1, VAN1</i>                                       |
| I     | 7       | <i>NDI1, YML119W, NGL3, NAB6, YML116W-A, ATR1, VAN1</i> |
| I     | 8       | <i>ATR1, VAN1, TAF8</i>                                 |
| II    | 9       | <i>MIH1, MSN2, CCS1</i>                                 |
| II    | 10      | <i>MIH1, MSN2, CCS1</i>                                 |
| II    | 11      | <i>MIH1, MSN2, CCS1</i>                                 |
| II    | 12      | <i>MIH1, MSN2, CCS1</i>                                 |
| III   | 13      | <i>SNX3, HAP5, VTS1, PDE2</i>                           |
| III   | 14      | <i>SNX3, HAP5, VTS1, PDE2</i>                           |
| III   | 15      | <i>PDE2, PRT1, PRE10</i>                                |
| IV    | 16      | <i>MRS6, GPB1</i>                                       |

**Supplementary Table 1. Plasmids isolated by the genetic screen in this study.**

**Supplementary Table 2**

| Plasmids                                        | Relevant markers                                        | Source                            |
|-------------------------------------------------|---------------------------------------------------------|-----------------------------------|
| pCgLEU2                                         | <i>C. glabrata LEU2</i> in pUC19                        | Sakumoto, N. et al. 1999          |
| pCgTRP1                                         | <i>C. glabrata TRP1</i> in pUC19                        | Sakumoto, N. et al. 1999          |
| pFA6a-kanMX6                                    | <i>kanMX6</i>                                           | Longtine, M. S. et al. 1998       |
| pFA6a-HIS3MX6                                   | <i>HIS3MX6</i>                                          | Longtine, M. S. et al. 1998       |
| pFA6a-natNT2                                    | <i>natNT2</i>                                           | Janke, C. et al. 2004             |
| pFA6a-hphNT1                                    | <i>hphNT1</i>                                           | Janke, C. et al. 2004             |
| pFA6a-GFP-HIS3MX6                               | <i>GFP-ADH 3'UTR-HIS3MX6</i>                            | Longtine, M. S. et al. 1998       |
| YEplac181                                       | <i>LEU2</i>                                             | Gietz, R. D. & Sugino, A 1988     |
| YCplac33                                        | <i>URA3</i>                                             | Gietz, R. D. & Sugino, A 1988     |
| pRS306                                          | <i>URA3</i>                                             | Sikorski, R. S. & Hieter, P. 1989 |
| YCplac33- $P_{ATG39}$ -GFP                      | <i>URA3, P<sub>ATG39</sub>-GFP</i>                      | Mizuno, T. et al. 2020            |
| pRS306- $P_{ATG39}$ -GFP                        | <i>URA3, P<sub>ATG39</sub>-GFP</i>                      | Mizuno, T. et al. 2020            |
| YEplac181-MSN2                                  | <i>LEU2, MSN2</i>                                       | this study                        |
| YEplac181-MSN4                                  | <i>LEU2, MSN4</i>                                       | this study                        |
| YEplac181-PDE2                                  | <i>LEU2, PDE2</i>                                       | this study                        |
| YCplac33- $P_{ATG39}$ -HIS3                     | <i>URA3, P<sub>ATG39</sub>-HIS3</i>                     | this study                        |
| YCplac33- $P_{MCM2}$ -HIS3                      | <i>URA3, P<sub>MCM2</sub>-HIS3</i>                      | this study                        |
| YCplac33- $P_{ATG39}$ (STRE1mut)-GFP            | <i>URA3, P<sub>ATG39</sub>(STRE1mut)-GFP</i>            | this study                        |
| YCplac33- $P_{ATG39}$ (STRE2mut)-GFP            | <i>URA3, P<sub>ATG39</sub>(STRE2mut)-GFP</i>            | this study                        |
| YCplac33- $P_{ATG39}$ (STRE1mut STRE2mut)-GFP   | <i>URA3, P<sub>ATG39</sub>(STRE1mut STRE2mut)-GFP</i>   | this study                        |
| YCplac33- $P_{ATG39}$ (STRE1mut STRE2mut)-ATG39 | <i>URA3, P<sub>ATG39</sub>(STRE1mut STRE2mut)-ATG39</i> | this study                        |
| pRS306- $P_{ATG39}$ (STRE1mut)-GFP              | <i>URA3, P<sub>ATG39</sub>(STRE1mut)-GFP</i>            | this study                        |
| pRS306- $P_{ATG39}$ (STRE2mut)-GFP              | <i>URA3, P<sub>ATG39</sub>(STRE2mut)-GFP</i>            | this study                        |
| pRS306- $P_{ATG39}$ (STRE1mut STRE2mut)-GFP     | <i>URA3, P<sub>ATG39</sub>(STRE1mut STRE2mut)-GFP</i>   | this study                        |
| pRS306- $P_{ATG39}$ (STRE1mut STRE2mut)-ATG39   | <i>URA3, P<sub>ATG39</sub>(STRE1mut STRE2mut)-ATG39</i> | this study                        |

**Supplementary Table 2. Plasmids used in this study.**

**Supplementary Table 3**

| Strains | Genotype                                                                                                                                                   | reference                |
|---------|------------------------------------------------------------------------------------------------------------------------------------------------------------|--------------------------|
| 10B     | <i>MAT<math>\alpha</math> ade2 trp1 can1 leu2 his3 ura3 GAL psi+ HO<math>\rho</math>-ADE2-HO 3' UTR</i>                                                    | Tadauchi, T. et al. 2001 |
| 10Ba    | <i>MAT<math>\alpha</math> ade2 trp1 can1 leu2 his3 ura3 GAL psi+ HO<math>\rho</math>-ADE2-HO 3' UTR</i>                                                    | Tadauchi, T. et al. 2001 |
| 10BD    | <i>MAT<math>\alpha</math>/MAT<math>\alpha</math> ade2/ade2 trp1/trp1 can1/can1 leu2/leu2 his3/his3 ura3/ura3</i>                                           | Tadauchi, T. et al. 2001 |
| YCH101  | <i>ade2 trp1 can1 leu2 his3 ura3 snf1 <math>\Delta</math>::CgTRP1</i>                                                                                      | Mizuno, T. et al. 2015   |
| YCH122  | <i>ade2 trp1 can1 leu2 his3 ura3 reg1 <math>\Delta</math>::CgLEU2</i>                                                                                      | Mizuno, T. et al. 2015   |
| YCH124  | <i>ade2 trp1 can1 leu2 his3 ura3 snf1 <math>\Delta</math>::CgTRP1 reg1 <math>\Delta</math>::CgLEU2</i>                                                     | Mizuno, T. et al. 2015   |
| YCH301  | <i>ade2 trp1 can1 leu2 his3 ura3 SEC63-GFP::HIS3MX6</i>                                                                                                    | Mizuno, T. et al. 2020   |
| YCH307  | <i>ade2 trp1 can1 leu2 his3 ura3 SEC63-GFP::HIS3MX6 atg40 <math>\Delta</math>::natNT2</i>                                                                  | Mizuno, T. et al. 2020   |
| YCH381  | <i>ade2 trp1 can1 leu2 his3 ura3 PGK1-GFP::HIS3MX6</i>                                                                                                     | Mizuno, T. et al. 2020   |
| YCH401  | <i>ade2 trp1 can1 leu2 his3 URA3::P<sub>ATG39</sub>-GFP</i>                                                                                                | Mizuno, T. et al. 2020   |
| YCH501  | <i>ade2 trp1 can1 leu2 his3 URA3::P<sub>ATG39</sub>-GFP msn2 <math>\Delta</math>::kanMX6</i>                                                               | this study               |
| YCH502  | <i>ade2 trp1 can1 leu2 his3 URA3::P<sub>ATG39</sub>-GFP msn4 <math>\Delta</math>::CgTRP</i>                                                                | this study               |
| YCH503  | <i>ade2 trp1 can1 leu2 his3 URA3::P<sub>ATG39</sub>-GFP msn2 <math>\Delta</math>::kanMX6 msn4 <math>\Delta</math>::CgTRP</i>                               | this study               |
| YCH506  | <i>ade2 trp1 can1 leu2 his3 URA3::P<sub>ATG39(STRE1mut)</sub>-GFP</i>                                                                                      | this study               |
| YCH507  | <i>ade2 trp1 can1 leu2 his3 URA3::P<sub>ATG39(STRE2mut)</sub>-GFP</i>                                                                                      | this study               |
| YCH508  | <i>ade2 trp1 can1 leu2 his3 URA3::P<sub>ATG39(STRE1mut STRE2mut)</sub>-GFP</i>                                                                             | this study               |
| YCH511  | <i>ade2 trp1 can1 leu2 his3 ura3 msn2 <math>\Delta</math>::kanMX6 msn4 <math>\Delta</math>::natNT2</i>                                                     | this study               |
| YCH512  | <i>ade2 trp1 can1 leu2 his3 ura3 snf1 <math>\Delta</math>::CgTRP1 msn2 <math>\Delta</math>::kanMX6 msn4 <math>\Delta</math>::natNT2</i>                    | this study               |
| YCH513  | <i>ade2 trp1 can1 leu2 his3 ura3 pde1 <math>\Delta</math>::CgLEU2 pde2 <math>\Delta</math>::CgTRP1</i>                                                     | this study               |
| YCH516  | <i>ade2 trp1 can1 leu2 his3 ura3 SEC63-GFP::HIS3MX6 msn2 <math>\Delta</math>::kanMX6 msn4 <math>\Delta</math>::CgTRP</i>                                   | this study               |
| YCH517  | <i>ade2 trp1 can1 leu2 his3 ura3 SEC63-GFP::HIS3MX6 atg40 <math>\Delta</math>::natNT2 msn2 <math>\Delta</math>::kanMX6 msn4 <math>\Delta</math>::CgTRP</i> | this study               |
| YCH518  | <i>ade2 trp1 can1 leu2 his3 ura3 SEC63-GFP::HIS3MX6 pde1 <math>\Delta</math>::CgLEU2 pde2 <math>\Delta</math>::CgTRP1</i>                                  | this study               |
| YCH521  | <i>ade2 trp1 can1 leu2 his3 ura3 PGK1-GFP::HIS3MX6 msn2 <math>\Delta</math>::kanMX6 msn4 <math>\Delta</math>::natNT2</i>                                   | this study               |
| YCH522  | <i>ade2 trp1 can1 leu2 his3 ura3 PGK1-GFP::HIS3MX6 pde1 <math>\Delta</math>::CgLEU2 pde2 <math>\Delta</math>::CgTRP1</i>                                   | this study               |
| YCH526  | <i>ade2 trp1 can1 leu2 his3 ura3 MSN2-GFP::HIS3MX6</i>                                                                                                     | this study               |
| YCH527  | <i>ade2 trp1 can1 leu2 his3 ura3 MSN2-GFP::HIS3MX6 pde1 <math>\Delta</math>::CgLEU2 pde2 <math>\Delta</math>::CgTRP1</i>                                   | this study               |
| YCH531  | <i>ade2 trp1 can1 leu2 his3 URA3::P<sub>ATG39</sub>-ATG39 SEC63-GFP::HIS3MX6 atg39 <math>\Delta</math>::kanMX6</i>                                         | this study               |
| YCH532  | <i>ade2 trp1 can1 leu2 his3 URA3::P<sub>ATG39(STRE1mut STRE2mut)</sub>-ATG39 SEC63-GFP::HIS3MX6 atg39 <math>\Delta</math>::kanMX6</i>                      | this study               |

10B and YCH are W303 derivatives.

### Supplementary Table 3. Strains used in this study.

**Supplementary Table 4**

| Gene Name    | Forward Primer       | Reverse Primer         |
|--------------|----------------------|------------------------|
| <i>ACT1</i>  | TGCCGAAAGAATGCAAAAGG | TCTGGAGGAGCAATGATCTTGA |
| <i>GFP</i>   | GGAGAGGGTGAAGGTGATGC | CTTCGGGCATGGCACTCTTG   |
| <i>ATG39</i> | TCCTTTGCAGGAGAGGACGA | GTTCCGCCAACATTTGAGCC   |
| <i>ATG40</i> | CAGTTGCCATTCCTTGCAG  | TGGGGACTGACCCAAAGAAG   |

**Supplementary Table 4. Primers used to analyze the mRNA level in this study.**
